# Supplementary material for: Flax Fiber for Technical Textile: A Life Cycle Inventory<strong> </strong>
Source: Preprints.org preprint supplement (doi:10.20944/preprints202010.0603.v1), 2020-10-29
Supplement: Supplementary file 2 [file supplementary]

## Sheet: LCI_Flax fibers
	CROP CULTIVATION		Value	Units	Process	Database	Process used by:	Value reference	Comments
	Input
	Tillage	Plowing	3	ha	Tillage, ploughing {CH}| processing | Conseq, U	Ecoinvent 3	1 & 2	2	No data sheet for Market for / Only European country / 3 passages
		Rotary cultivator	1	ha	Tillage, rotary cultivator {CH}| processing | Conseq, U	Ecoinvent 3	1 & 2	1 & 2	No data sheet for Market for / Only European country / 1 passage
		Harrowing	1	ha	Tillage, harrowing, by rotary harrow {CH}| processing | Conseq, U	Ecoinvent 3	1 & 2	1 & 2	No data sheet for Market for / Only European country / 1 passage
	Sowing		1	ha	Sowing {CH}| processing | Conseq, U	Ecoinvent 3	1 & 2	1 & 2	No data sheet for Market for / Only European country / 1 passage
	Fertilizing & zinc application by broadcaster		3	ha	Fertilising, by broadcaster {CH}| processing | Conseq, U	Ecoinvent 3	1 & 2	1 & 2	No data sheet for Market for / Only European country / 3 passages
	Plant protection (Herbicides&Pesticides) by field sprayer		5.5	ha	Application of plant protection product, by field sprayer {CH}| processing | Conseq, U	Ecoinvent 3	1 & 2	1 & 2	Market for Data sheet available / Only European country / 5.5 passages
	Pulling		1	ha	Swath, by rotary windrower {CH}| processing | Conseq, U	Ecoinvent 3	1 & 2	1 & 2	Market for Data sheet available / Only European country / 1 passages
	Seeds		115	kg	Flaxseed, national average, animal feed, at farm gate/FR U	Agribalyse	1	-
	Land Use		1	ha*a	Occupation, annual crop	Substance	-	-
	Fertilizers	Potassium chloride	117	kg	Potassium chloride, as K2O/FR U	Agribalyse	-	1 & 2	Data includes transport. Uses RER and RoW data from Ecoinvent based on Imports data. Data from Ecoinvent is Alloc Rec S
		Ammonium nitrate phosphate	86	kg	Ammonium nitrate phosphate, as N/FR U	Agribalyse	-	1 & 2 & 4
		Triple superphosphate	146	kg	Triple superphosphate, as P2O5/FR U	Agribalyse	-	1 & 2
	Pesticides	Carbendazime / Benzimidazole	150	g	Benzimidazole-compound {GLO}| market for | Conseq, U	Ecoinvent 3	1	1 & 2
		Prochloraze	38	g	Cyclic N-compound {GLO}| market for | Conseq, U	Ecoinvent 3	1	1 & 2	For seed treatment (prochlorase)
		Flusilazole	300	g	Cyclic N-compound {GLO}| market for | Conseq, U	Ecoinvent 3	1	1 & 2	During flax cultivation (flusilazole)
		Thirame	73	g	Dithiocarbamate-compound {GLO}| market for | Conseq, U	Ecoinvent 3	1	1 & 2
	Herbicides	Triallate	144	g	[thio]carbamate-compound {GLO}| market for | Conseq, U	Ecoinvent 3	1	1 & 2
		Linuron	90	g	[sulfonyl]urea-compound {GLO}| market for | Conseq, U	Ecoinvent 3	1	1 & 2
		Bentazone	1584	g	Benzo[thia]diazole-compound {GLO}| market for | Conseq, U	Ecoinvent 3	1	1 & 2
	Insecticides	Deltamethrin / Pyrethroid	15	g	Pyrethroid-compound {GLO}| market for | Conseq, U	Ecoinvent 3	1	1 & 2
	Zinc	For seed's treatment	414	g	Zinc concentrate {GLO}| market for | Conseq, U	Ecoinvent 3	1	1	Not considered in the model as Agribalyse process for flax seed production already considers their treatment with zinc.
		For soil treatment after sowing	1000	g	Zinc concentrate {GLO}| market for | Conseq, U	Ecoinvent 3	1	1
	Copper		9.527	g	Copper	Substance	-	3	Copper is taken out of the soil by the plant. 8.4 g of Copper taken by the 6170 kg of flax yield from 1 ha as considered by the reference (0.001361 kg Cu/kg FM of flax)
	Iron		3.4839	kg	Iron	Substance	-	-	553 mg/kg DM - Value from Feedipedia "Flax straw" data (https://www.feedipedia.org/node/12103)
	Calcium		30.24	kg	Calcium	Substance	-	-	4.8 g/kg DM - Value from Feedipedia "Flax straw" data (https://www.feedipedia.org/node/12103)
	Carbon dioxide (captured from air)		10395	kg	Carbon dioxide, in air	Substance	-	2	Le Duigou et el. 2011 report 1,65 kg of CO2 sequestered to produce one kg of dry flax fibers.
	Output
	Flax stems		7000	kg	"Crop cultivation" process created	-	-	1 & 2
	Induced Land Use Change		0.05	ha	"iLUC" process created	-	-	-	The value results from the annualization of 1 ha over 20 years (based on EU methods). Detailed information on the creation of the process on the iLUC tab
	Emissions to air	Ammonia	0.73	kg	Ammonia	Substance	-	1
		Dinitrogen monoxide	0.49	kg	Dinitrogen monoxide	Substance	-	1
		Nitrogen dioxide	0.1	kg	Nitrogen dioxide	Substance	-	1
		Carbendazim	7.5	g	Carbendazim	Substance	-	1
		Triallate	136.8	g	Triallate	Substance	-	1
		Linuron	45	g	Linuron	Substance	-	1
		Bentazone	237.6	g	Bentazone	Substance	-	1
		Deltamethrin (pyrethroid)	0.15	g	Deltamethrin	Substance	-	1
	Emissions to water	Carbendazim	0.75	g	Carbendazim	Substance	-	1
		Triallate (groundwater)	1.57	g	Triallate (Sub-compartment: groundwater)	Substance	-	1
		Triallate (river)	0.86	g	Triallate (Sub-compartment: river)	Substance	-	1
		Linuron	0.45	g	Linuron	Substance	-	1
		Bentazone	7.9	g	Bentazone	Substance	-	1
		Deltamethrin (pyrethroid)	0.075	g	Deltamethrin (pyrethroid)	Substance	-	1
		Nitrate	25	kg	Nitrate	Substance	-	1
		Phosphate	0.93	kg	Phosphate	Substance	-	1
		Nickel (river)	1.51	g	Nickel (Sub-compartment: river)	Substance	-	3
		Phosphorus (groundwater)	0.07	kg	Phosphorus (Sub-compartment: groundwater)	Substance	-	3
		Phosphorus (river)	0.276	kg	Phosphorus (Sub-compartment: river)	Substance	-	3
		Cadmium (groundwater)	42.24	mg	Cadmium (Sub-compartment: groundwater)	Substance	-	3
		Cadmium (river)	18.68	mg	Cadmium (Sub-compartment: river)	Substance	-	3
		Chromium (groundwater)	20.87	g	Chromium (Sub-compartment: groundwater)	Substance	-	3
		Chromium (river)	2.18	g	Chromium (Sub-compartment: river)	Substance	-	3
		Lead (groundwater)	102.7	mg	Lead (Sub-compartment: groundwater)	Substance	-	3
		Lead (river)	307.3	mg	Lead (Sub-compartment: river)	Substance	-	3
		Mercury (groundwater)	0.17	mg	Mercury (Sub-compartment: groundwater)	Substance	-	3
		Mercury (river)	0.44	mg	Mercury (Sub-compartment: river)	Substance	-	3
		Zinc (groundwater)	10.4	g	Zinc (Sub-compartment: groundwater)	Substance	-	3
		Zinc (river)	1.44	g	Zinc (Sub-compartment: river)	Substance	-	3
		Copper (groundwater)	2.73	g	Copper (Sub-compartment: groundwater)	Substance	-	3
		Copper (river)	1.4	g	Copper (Sub-compartment: river)	Substance	-	3
	Emissions to soil	Arsenic (As)	0.56	g	Arsenic	Substance	-	1
		Cadmium (Cd)	18	g	Cadmium	Substance	-	1
		Cobalt (Co)	1.5	g	cobalt	Substance	-	1
		Chromium (Cr)	92	g	Chromium	Substance	-	1
		Copper (Cu)	17	g	copper	Substance	-	1
		Iron (Fe)	5965	g	Iron	Substance	-	1
		Mercury (Hg)	0.011	g	Mercury	Substance	-	1
		Molybdenum (Mo)	1.2	g	Molybdenum	Substance	-	1
		Nickel (Ni)	17	g	Nickel (Sub-compartment: river)	Substance	-	1
		Lead (Pb)	2.2	g	Lead	Substance	-	1
		Selenium (Se)	1	g	Selenium	Substance	-	1
		Zinc (Zn)	116	g	Zinc	Substance	-	1
	RETTING		Value	Units	Datasheet	Database	As used by:	Reference	Comments
	Input
	Flax stems		7000	kg	-	-	-	-
	Land Use		1	ha	Occupation, annual crop	Substance	-	1 & 2
	Agricultural Machinery	Turnover	2	ha	Haying, by rotary tedder {CH}| processing | Conseq, U	Agribalyse	-	1 & 2	Ecoinvent datasheet selected (Agribalyse datasheet units are in hr) / 2 passages
		Collecting	4.67	m3	Fodder loading, by self-loading trailer {CH}| processing | Conseq, U	Ecoinvent 3	1 & 2	1 & 2	Value based on flax density=1,5g/cm3 (Amiri et al., 2017)
	Output*
	Retted flax		6230	kg	"Retting" process created	Substance	-	1 & 2	89% of flax stems yield
	CO2 emissions		544.597	kg	Carbon dioxide, biogenic	Substance	-	-
	CH4 emissions		4.55	kg	Methane, biogenic	Substance	-	-
	CO emissions		1.21	kg	Carbon monoxide, biogenic	Substance	-	-
	NH3 emissions		0.42	kg	Ammonia	Substance	-	-
	N2O direct emissions		0.098	kg	Dinitrogen monoxide	Substance	-	-
	N2O indirect emissions		5.4E-05	kg	Dinitrogen monoxide	Substance	-	-
	SCUTCHING		Value	Units	Datasheet	Database	As used by:	Reference	Comments
	Input
	Retted flax		6230	kg	-	-	-	-
	Electricity		722.68	kWh	Electricity, low voltage {FR}| market for | Conseq, U	Ecoinvent 3	1	1 & 2	0.116 kWh per kg of retted flax to go throught the scutching machine
	Transport from field		249.2	tkm	Transport, freight, lorry 16-32 metric ton, EURO3 {GLO}| market for | Conseq, U	Ecoinvent 3	1	1	Considers a 40 km distance as scutching facilities are located close to the cultivation fields.
	Output
	Long fibers		1470	kg	"Scutching" process created	-	-	1 & 2	21% of flax stems yield
	Short fibers		770	kg	"Scutching" process created	-	-	1 & 2	11% of flax stems yield
	Grains		350	kg	"Scutching" process created	-	-	1 & 2	5% of flax stems yield
	Shives		2520	kg	"Scutching" process created	-	-	1 & 2	36% of flax stems yield
	Flakes		490	kg	"Scutching" process created	-	-	1 & 2	7% of flax stems yield
	Inert residues		630	kg	"Scutching" process created	-	-	1 & 2	9% of flax stems yield. Information on the process creation under the tab "Inert Residues Emissions"
	Co-products fate*
	Production of glass fiber composites (Short fibers)		-693	kg	"Avoided glass fibre production (Short fibres)" process created	Ecoinvent 3	-	-	Copied from "Glass fibre {GLO}| market for | Conseq, U" / 1 to 1 fiber substitution is considered and a 90% DM content.
	Marginal oil production (Linseed oil from Grains)		-99.2775	kg	"Avoided palm oil production (Seeds)" process created	Ecoinvent 3	-	-	Copied from "Palm oil, refined {GLO}| market for | Conseq, U"
	Marginal animal feed production (Linseed meal)	Marginal protein (soybean)	-176.854	kg	"Avoided soybean meal production (Linseed meal)" process created	Ecoinvent 3	-	-	Copied from "Soybean meal {GLO}| market for | Conseq, U"
		Marginal carbohydrate (maize)	-149.308	kg	"Avoided maize grain production (Linseed meal)" process created	Ecoinvent 3	-	-	Copied from "Maize grain {GLO}| market for | Conseq, U"
		Marginal fats (palm oil)	-3.83	kg	"Avoided palm oil production (Linseed meal)" process created	Ecoinvent 3	-	-	Copied from "Palm oil, refined {GLO}| market for | Conseq, U"
	Avoided Land Use Change		-0.013	ha	iLUC	-	-	-
	Combustion of woody residues		40.9167	GJ	"Wood residues combustion" process created from proxy	Ecoinvent 3	-	-	Copied from "Heat, district or industrial, other than natural gas {CH}| heat production, softwood chips from forest, at furnace 300kW | Conseq, U"
	Heat production from natural gas (Shives)		-32.7334	GJ	"Avoided heat production from natural gas (Shives)" process created	Ecoinvent 3	-	-	Copied from "Heat, central or small-scale, natural gas {Europe without Switzerland}| market for heat, central or small-scale, natural gas | Conseq, U"
	Marginal animal feed production (Flakes)	Marginal protein (soybean)	-81.0555	kg	"Avoided soybean meal production (Flakes)" process created	Ecoinvent 3	-	-	Copied from "Soybean meal {GLO}| market for | Conseq, U"
		Marginal fibre (hay)	-665.926	kg	"Avoided hay production (Flakes)" process created	Ecoinvent 3	-	-	Copied from "Hay {GLO}| market for | Conseq, U"
	Use of inert residues as amendment		630	kg	"Soil amendment (Scutching)" process created	Ecoinvent 3	-	-	Information on the process creation under the tab "Inert Residues Emissions"
	COMBING		Value	Units	Datasheet	Database	As used by:	Reference	Comments
	Input
	Long fibers		1470	kg	-	-	-	-
	Electricity		808.5	kWh	Electricity, low voltage {FR}| market for | Conseq, U	Ecoinvent 3	-	1 & 2	0.55 kWh per kg of scutched flax
	Output
	Flax Sliver		980	kg	"Combing" process created	Ecoinvent 3	-	1 & 2	14% of flax stem yield
	Flax tow		420	kg	"Combing" process created	Ecoinvent 3	-	1 & 2	6% of flax stem yield
	Dust		70	kg	"Combing" process created	Ecoinvent 3	-	1 & 2	1% of flax stem yield
	Co-products fate*
	Use of inert residues as amendment		490	kg	"Soil amendment (Combing)" process created	Ecoinvent 3	-	-	Flax tow and Dust mass are considered as a whole for the composting process
	SPINNING		Value	Units	Datasheet	Database	As used by:	Reference	Comments
	Input
	Flax Sliver		980	kg	-	-	-	1 & 2
	Electricity		4413.5	kWh	Electricity, low voltage {CN}| market for | Conseq, U	Ecoinvent 3	-	1	4.85 kWh/kg of yarn produced (Includes energy intake for washing, bleaching and spinning; might be lower for technical fabric as some of these steps might not be required).
	Gas		24024	MJ	Electricity, high voltage {CN-JS}| electricity production, natural gas, conventional power plant | Conseq, U	Ecoinvent 3	-	1	26.4 MJ/ kg of yarn produced (Includes energy intake for washing, bleaching and spinning; might be lower for technical fabric as some of these steps might not be required).
	Water		12.74	m3	Water, unspecified natural origin, CN	Substances	-	1	13 L/kg of silver spun into yarn (as wet-spinning is consdered by the reference).
	Lubricating oil		49	kg	Lubricating oil {GLO}| market for | Conseq, U	Ecoinvent 3	-	1	50 g/kg of silver spun into yarn.
	Transport from Combing facility to port		147	tkm	Transport, freight, lorry 16-32 metric ton, EURO3 {GLO}| market for | Conseq, U	Ecoinvent 3	1	1	150 kms are considered between the Combing facility and Le Havre port.
	Transport from port to port		19110	tkm	Transport, freight, sea, transoceanic ship {GLO}| market for | Conseq, U	Ecoinvent 3	1	1	19500 kms are considered between the Le Havre port in France and the Nanjing port in china (Jiangsu province).
	Transport from port to factory		196	tkm	Transport, freight, lorry 16-32 metric ton, EURO3 {GLO}| market for | Conseq, U	Ecoinvent 3	1	1	200 km are considered between the Nanjing port and the factory where the combing, spinning and weaving stages will take place.
	Input data for Sensitivity Analysis (production in France rather than China)
	Electricity		4413.5	kWh	Electricity, low voltage {FR}| market for | Conseq, U	Ecoinvent 3	-	-
	Gas		24024	MJ	Electricity, high voltage {FR}| electricity production, natural gas, conventional power plant | Conseq, U	Ecoinvent 3	-	-
	Water		12.74	m3	Water, unspecified natural origin, FR	Substances	-	-
	Transport from Combing to Spinning facility		98	tkm	Transport, freight, lorry 16-32 metric ton, EURO3 {GLO}| market for | Conseq, U	Ecoinvent 3	-	-	100 km are considered between Combing and Spinning facilities as they're based in the Normandy area in France (from CELC-annuaries webpage data).
	Output
	Flax Yarn		910	kg	"Spinning" process created	-	-	1	4% mass loss according to BioIntelligence (2007), not specified why.
	Wastewater		12.74	m3	"Wastewater treatment (from Spinning)" process created	Ecoonvent 3	-	1	Copied from "Wastewater, average {RoW}| treatment of, capacity 1E9l/year | Conseq, U"
	WEAVING		Value	Units	Datasheet	Database	As used by:	Reference	Comments
	Input
	Flax Yarn		910	kg	-	-	-	1
	Electricity		11830	kWh	Electricity, low voltage {CN}| market for | Conseq, U	Ecoinvent 3	-	1	13 kWh/kg of yarn woven.
	Starch		159.25	kg	Potato starch {GLO}| market for | Conseq, U	Ecoinvent 3	-	1	175 g of starch/kg of yarn processed. There is no potato starch datasheet for China so we take the Global information available.
	Transport from factory to port		168	tkm	Transport, freight, lorry 16-32 metric ton, EURO3 {GLO}| market for | Conseq, U	Ecoinvent 3	1	1	200 km are considered between the Nanjing port and the factory where the combing, spinning and weaving stages will take place.
	Transport from port to port		16380	tkm	Transport, freight, sea, transoceanic ship {GLO}| market for | Conseq, U	Ecoinvent 3	1	1	19500 kms are considered between the Le Havre port in France and the Nanjing port in china (Jiangsu province).
	Transport from port to distribution place		168	tkm	Transport, freight, lorry 16-32 metric ton, EURO3 {GLO}| market for | Conseq, U	Ecoinvent 3	1	1	200 km are considered from porto to distribution facilities (reference considers Paris as distribution place)
	Input data for Sensitivity Analysis (production in France rather than China)
	Electricity		11830	kWh	Electricity, low voltage {FR}| market for | Conseq, U	Ecoinvent 3	-	-
	Transport from Spinning to Weaving facility		182	tkm	Transport, freight, lorry 16-32 metric ton, EURO3 {GLO}| market for | Conseq, U	Ecoinvent 3	-	-	200 kms are considered between the Spinning and Weaving facilities (from CELC-annuaries webpage data). Transport of flax yarn.
	Transport from Weaving facility to Distributors		168	tkm	Transport, freight, lorry 16-32 metric ton, EURO3 {GLO}| market for | Conseq, U	Ecoinvent 3	-	-	200 kms are considered between the Weaving facilities and Distributors (from CELC-annuaries webpage data). Transport of finished product (technical textile).
	Output
	Technical textile		840	kg	"Weaving" process created	-	-	1
	Units are expressed per hectare used per year
	References
	1 BioIntelligence (2007)
	2 Le Duigou et al., 2011
	3 Besandoun et al., 2016
	4 Flaxseed Datasheet (Agribalyse)

## Sheet: iLUC
	iLUC		1	ha	Process	Database	Comments
	Input
	Land expansion		1	ha	Land expansion process created	-
	Land intensification		1	ha	Land intensification process created	-
	Land expansion		1	ha	Process	Database	Comments
	Input
	Land expansion_clearing		1	ha	Land expansion_clearing process created	-
	Land expansion_foregone sequestration		1	ha	Land expansion_foregone sequestration process created	-
	Land expansion_clearing		1	ha	Process	Database	Comments
	Output
	Carbon dioxide emissions to air		71.59	ton	Carbon dioxide, land transformation	Substance	Land clearing, AG biomass
	Carbon monoxide emissions to air		4.708	ton	Carbon monoxide, land transformation	Substance	Land clearing, AG biomass
	Methane emissions to air		0.3068	ton	Methane, land transformation	Substance	Land clearing, AG biomass
	Dinitrogen monoxide emissions to air		0.00908	ton	Dinitrogen monoxide	Substance	Land clearing, AG biomass
	Nitrogen oxides emissions to air		0.07329	ton	Nitrogen oxides	Substance	NOx as NO2. Land clearing, biomass
	Land expansion_foregone sequestration		1	ha	Process	Database	Comments
	Output
	Carbon dioxide emissions to air		0.74	ton	Carbon dioxide, land transformation	Substance
	Land intensification		1	ha	Process	Database	Comments
	Input
	Nitrogen (N) fertilizer		166	kg	Urea, as N {GLO}| market for | Conseq, U	Ecoinvent v3.4	Additional fertilizer used in intensified production
	Phosphate (P) fertilizer		68	kg	Phosphate fertiliser, as P2O5 {RER}| diammonium phosphate production | Conseq, U	Ecoinvent v3.4	Additional fertilizer used in intensified production. No GLO so RER selected.
	Potassium (K) fertiliser		47	kg	Potassium chloride, as K2O {GLO}| market for | Conseq, U	Ecoinvent v3.4	Additional fertilizer used in intensified production
	Output
	Carbon dioxide emissions to air		261	kg	Carbon dioxide	Substance	From urea CO2. IPCC (2006) Chap 11
	Dinitrogen monoxide emissions to air		4.4	kg	Dinitrogen monoxide	Substance
	Ammonia emissions to air		4	kg	Ammonia	Substance
	Nitrogen oxides emissions to air		6	kg	Nitrogen oxides	Substance
	Nitrate emissions to water		146	kg	Nitrate	Substance

## Sheet: Inert Residues Emissions
*Units per kg of inert residue
Soil amendment (Scutching)		Value	Units	Datasheet	Database	Reference	Comments
Output*
Emissions to air	CO2 emissions	0.31	kg	Carbon dioxide, biogenic	Substance	Hamelin et al. (2014)	CO2 = 71% of total C
	NH3 emissions	2.0E-05	kg	Ammonia	Substance		NH3-N = 0,5% of TAN TAN = 92% of total N
	N2O direct emissions	5.5E-05	kg	Dinitrogen monoxide	Substance		N2O-N direct = 0,01 kg / kg of total N
	N2O indirect emissions	2.6E-07	kg	Dinitrogen monoxide	Substance		N2O-N indirect = 0,01 kg / kg (NH3-N NOx-N)
	N2O indirect emissions (from N leaching)	1.4E-05	kg	Dinitrogen monoxide	Substance		N2O-N indirect = 0,0075 kg / kg of N leaching
	NOx emissions	1.6E-06	kg	Nitrate compounds	Substance		NOx-N= 0,01*N2O-N direct
Emissions to water	Nitrate leaching	1.2E-03	kg	Nitrate	Substance		N leaching = 33% of total N
	P leaching	2.3E-05	kg	Phosphate	Substance		P leaching = 5% of total P
Soil amendment (Combing)		Value	Units	Datasheet	Database	Reference	Comments
Output*
Emissions to air	CO2 emissions	0.31	kg	Carbon dioxide, biogenic	Substance	Hamelin et al. (2014)	CO2 = 71% of total C
	NH3 emissions	2.0E-05	kg	Ammonia	Substance		NH3-N = 0,5% of TAN TAN = 92% of total N
	N2O direct emissions	5.5E-05	kg	Dinitrogen monoxide	Substance		N2O-N direct = 0,01 kg / kg of total N
	N2O indirect emissions	2.6E-07	kg	Dinitrogen monoxide	Substance		N2O-N indirect = 0,01 kg / kg (NH3-N NOx-N)
	N2O indirect emissions (from N leaching)	1.4E-05	kg	Dinitrogen monoxide	Substance		N2O-N indirect = 0,0075 kg / kg of N leaching
	NOx emissions	1.6E-06	kg	Nitrate compounds	Substance		NOx-N= 0,01*N2O-N direct
Emissions to water	Nitrate leaching	1.2E-03	kg	Nitrate	Substance		N leaching = 33% of total N
	P leaching	2.3E-05	kg	Phosphate	Substance		P leaching = 5% of total P
